# Supplementary material for: Early Effector CD8 T Cells Display Plasticity in Populating the Short-Lived Effector and Memory-Precursor Pools Following Bacterial or Viral Infection
Source: Sci Rep. 2015 Jul 20;5:12264. doi: 10.1038/srep12264 (PMC4507483; doi:10.1038/srep12264)
Supplement: Supplementary Information [file srep12264-s1.pdf]

# **Early Effector CD8 T Cells Display Plasticity in Populating the Short-Lived Effector and Memory-Precursor Pools Following Bacterial or Viral Infection**

Courtney R. Plumlee<sup>1#</sup>, Joshua J. Obar<sup>3</sup>, Sara L. Colpitts<sup>1</sup>, Evan R. Jellison<sup>1</sup>, W. Nicholas Haining<sup>4</sup>, Leo Lefrancois<sup>1</sup> and Kamal M. Khanna<sup>1,2\*</sup>

<sup>1</sup> Dept. of Immunology, Dept of Pediatrics, University of Connecticut Health Center, Farmington, CT

<sup>2</sup>Dept of Pediatrics, University of Connecticut Health Center, Farmington, CT

<sup>3</sup> Dept. of Immunology & Infectious Disease, Montana State University, Bozeman, MT

<sup>4</sup> Dept. of Pediatric Oncology, Dana-Farber Cancer Institute, Boston, MA

<sup>#</sup>Current Address: Seattle Biomedical Research Institute, Seattle, WA

\* Corresponding author

[kkhanna@uchc.edu](mailto:kkhanna@uchc.edu) (KMK)

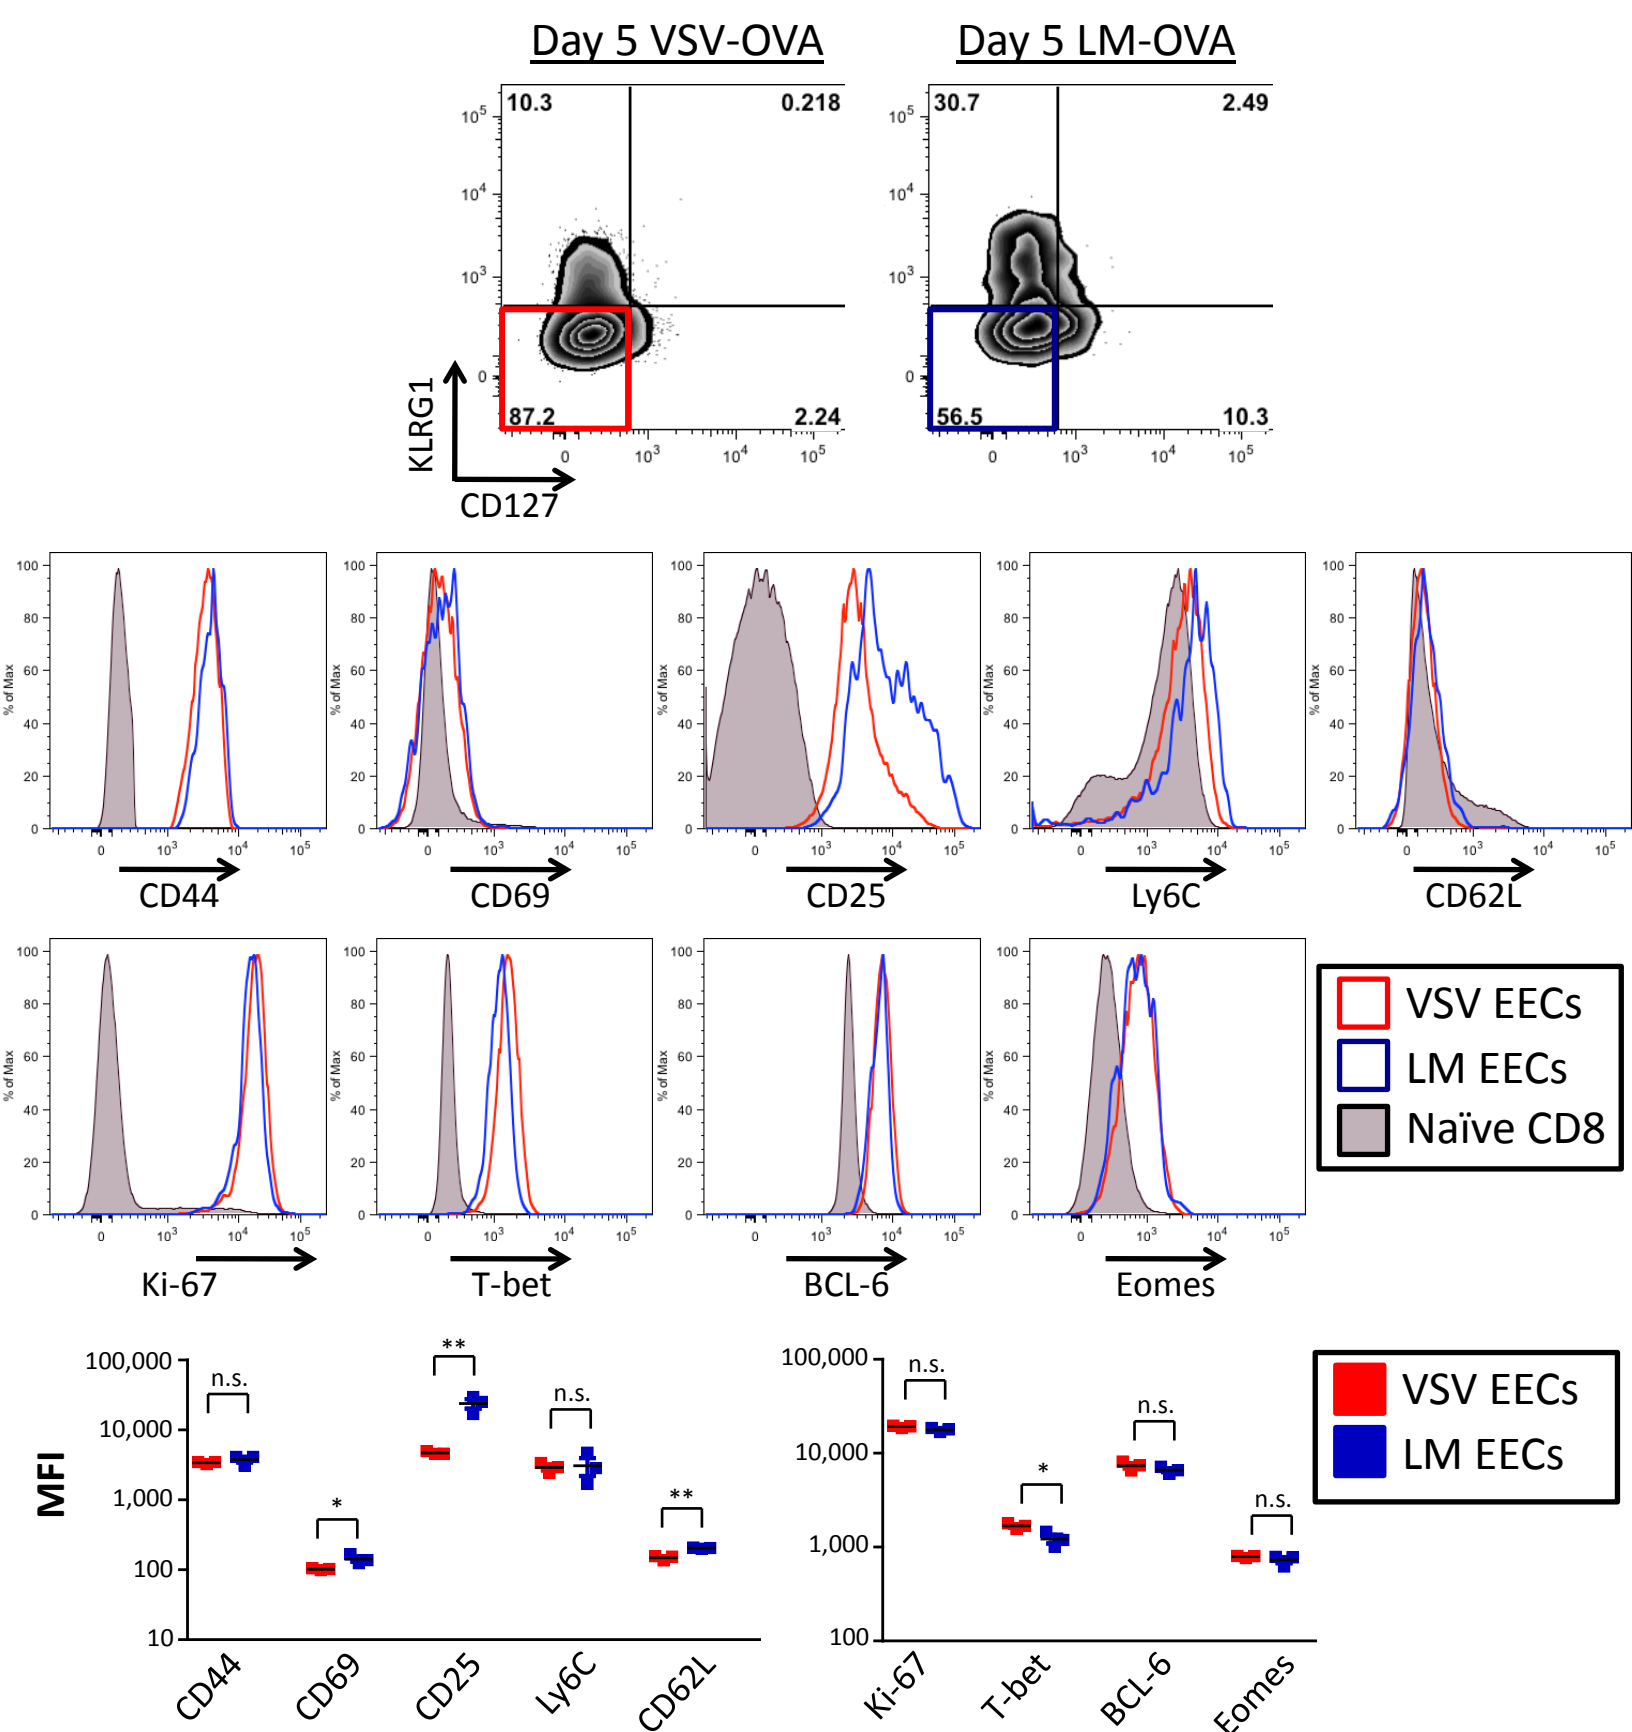

### Supplemental Figure 1. Phenotyping Day 5 EECs.

1,000 CD45.1<sup>+</sup> OT-I cells were transferred into uninfected CD45.2<sup>+</sup> recipients one day prior to infection with VSV-OVA or LM-OVA. 5 days following infection, CD8<sup>+</sup> CD45.1<sup>+</sup> transferred OT-I cells were analyzed for CD127 and KLRG1 expression. The CD127<sup>-</sup>, KLRG1<sup>-</sup> EECs were then further analyzed for CD44, CD69, CD25, Ly6C, CD62L, Ki-67, Tbet, Bcl-6, and Eomes expression. Histograms are shown from a representative mouse of 3 with VSV EECs, LM EECs, and CD44-low naïve CD8 T cells overlaid. The Mean Fluorescence Intensity (MFI) for each marker was graphed. This experiment was repeated at least twice.

### VSV EECs

### VSV+ODN 1826 EECs

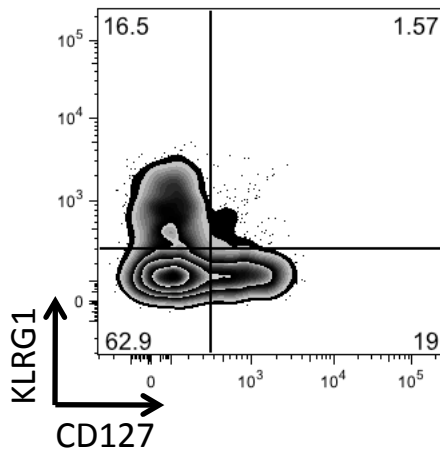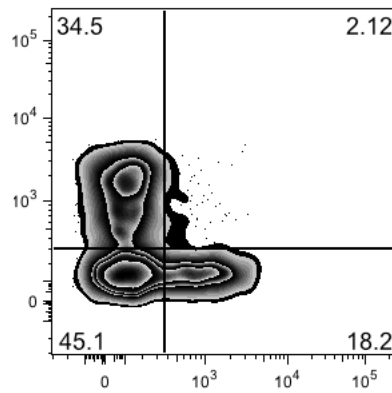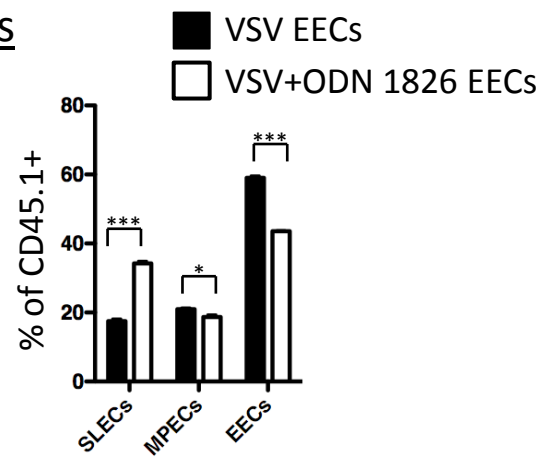

### Supplemental Figure 2. ODN 1826 CpG treatment combined with VSV infection drives more SLEC differentiation.

EECs were purified, as described in Figure 2A, following VSV-OVA infection, or VSV-OVA infection with 50ug ODN 1826 CpG given i.p 90 minutes following infection and transferred into uninfected recipients. 3 days following the EEC transfer, CD8<sup>+</sup> CD45.1<sup>+</sup> transferred EECs in the spleen were analyzed for KLRG1 and CD127 expression. Percentages of SLECs, MPECs, and EECs are graphed for both VSV EECs and VSV+ODN 1826 CpG EECs from 3-4 mice.
